# Supplementary material for: Cerebral Microbleeds During Transcatheter Aortic Valve Replacement: A Prospective Magnetic Resonance Imaging Cohort
Source: PubMed Central journal article supplement (PMC9345525; doi:10.1161/circulationaha.121.057145), 2022-06-20
Supplement: cir-146-383-s001.pdf [file cir-146-383-s001.pdf]

## **CEREBRAL MICROBLEEDS DURING TAVR: A PROSPECTIVE MRI COHORT**

Eric Van Belle MD-PhD\*<sup>1,2</sup>, Nicolas Debry MD\*<sup>1,2</sup>, Flavien Vincent MD<sup>1,2</sup>, Grégory Kuchcinski MD<sup>3</sup>, Charlotte Cordonnier MD-PhD<sup>4</sup>, Antoine Rauch MD-PhD<sup>2,5</sup>, Emmanuel Robin MD<sup>6</sup>, Fanny Lassalle PharmD<sup>5</sup>, François Pontana MD-PhD<sup>6</sup>, Cédric Delhayé MD<sup>1</sup>, Guillaume Schurtz MD<sup>1</sup>, Emmanuelle JeanPierre PharmD<sup>2,5</sup>, Natacha Rousse MD<sup>7</sup>, Caterina Casari PhD<sup>8</sup>, Hugues Spillemaeker MD<sup>1</sup>, Sina Porouchani MD<sup>1</sup>, Thibault Pamart MD<sup>1</sup>, Tom Denimal MD<sup>1</sup>, Xavier Neiger MD<sup>1</sup>, Basile Verdier MD<sup>1</sup>, Laurent Puy<sup>4</sup>, Alessandro Cosenza MD<sup>1</sup>, Francis Juthier MD<sup>7</sup>, Marjorie Richardson MD<sup>1</sup>, Martin Bretzner MD<sup>6</sup>, Jean Dallongeville MD-PhD<sup>9</sup>, Julien Labreuche BST<sup>10</sup>, Mikael Mazighi, MD-PhD<sup>11</sup>, Annabelle Dupont-Prado PharmD-PhD<sup>2,5</sup>, Bart Staels PhD<sup>2</sup>, Peter J. Lenting PhD<sup>8</sup>, Sophie Susen MD-PhD<sup>2,5</sup>

## **SUPPLEMENTAL MATERIAL**

|                                             | Study group<br>(n=84) | Postprocedural ≥1<br>new CMB (n=19) | Postprocedural no<br>new CMB (n=65) | P value<br>(Postprocedural) |
|---------------------------------------------|-----------------------|-------------------------------------|-------------------------------------|-----------------------------|
| <b><u>VARC 2 criteria</u></b>               | -                     | -                                   | -                                   | -                           |
| Device success n (%)                        | 70 (84)               | 15 (79)                             | 55 (85)                             | 0.73                        |
| All Bleedings n (%)                         | 23 (27)               | 7 (36)                              | 16 (24)                             | 0.31                        |
| Vascular Complications n (%)                | 10 (11)               | 2 (10)                              | 8 (12)                              | 0.83                        |
| CHF n (%)                                   | 2 (2)                 | 0 (0)                               | 2 (3)                               | 0.43                        |
| Stage 2-3 AKI n (%)                         | 13 (15)               | 3 (15)                              | 10 (15)                             | 0.86                        |
| New AF episode n (%)                        | 4 (5)                 | 1 (5)                               | 3 (5)                               | 0.90                        |
| Clinical TIA/Stroke n (%)                   | 5 (5)                 | 0 (0)                               | 5 (7)                               | 0.21                        |
| IntraHospital death n (%)                   | 1 (1)                 | 1 (1)                               | 0 (0)                               | 0.06                        |
| <b><u>TTE</u></b>                           | -                     | -                                   | -                                   | -                           |
| Aortic Regurgitation ≥2                     | 9 (11)                | 4 (21)                              | 5 (8)                               | 0.09                        |
| Mean gradient mmHg mean ± SD                | 10.5 ± 4.6            | 11.2 ± 4.2                          | 10.4 ± 4.9                          | 0.82                        |
| Aortic valve area cm <sup>2</sup> mean ± SD | 1.77 ± 0.58           | 1.76 ± 0.50                         | 1.77 ± 0.60                         | 0.97                        |

**Supplemental Table 1. Early post-procedural outcome and new post-procedural CMB**

Early post-procedural outcomes at 30 days (VARC-2 criteria).

AF: atrial fibrillation; AKI: acute kidney injury; CHF: congestive heart failure; CMB: Cerebral microbleed; TIA transient ischemic accident; TTE transthoracic echography.

|                                                              | All<br>(n=84) | Preprocedural ≥1 CE<br>(n=5) | Preprocedural<br>no CE (n=79) | P value          |
|--------------------------------------------------------------|---------------|------------------------------|-------------------------------|------------------|
| <b><u>Clinical data</u></b>                                  | -             | -                            | -                             | -                |
| Age, yrs mean ± SD                                           | 80.6 ± 5.6    | 76.5 ± 5.6                   | 80.9 ± 5.5                    | 0.06             |
| Male n (%)                                                   | 42 (50)       | 3 (60)                       | 39 (49)                       | 0.64             |
| BMI (kg/m <sup>2</sup> ) mean ± SD                           | 27.9 ± 5.9    | 32.8 ± 11.1                  | 27.6 ± 5.4                    | 0.06             |
| Logistic Euroscore % mean ± SD                               | 20.0 ± 4.3    | 20.7 ± 7.2                   | 20.0 ± 12.6                   | 0.90             |
| STS score Mortality % mean ± SD                              | 12.3 ± 7.6    | 12.3 ± 5.7                   | 12.4 ± 7.8                    | 0.97             |
| STS score permanent-stroke % mean ± SD                       | 6.5 ± 2.4     | 7.9 ± 3.2                    | 6.4 ± 2.4                     | 0.17             |
| Recent endovascular procedures < 1 month n (%)               | 10 (11)       | 4 (80)                       | 6 (7)                         | <b>&lt;0.001</b> |
| <b><u>Comorbidities</u></b>                                  | -             | -                            | -                             | -                |
| Hypertension n (%)                                           | 60 (71)       | 3 (60)                       | 57 (72)                       | 0.55             |
| Diabetes n (%)                                               | 28 (33)       | 4 (80)                       | 24 (30)                       | <b>0.02*</b>     |
| Atrial Fibrillation n (%)                                    | 30 (35)       | 2 (40)                       | 28 (35)                       | 0.83             |
| Severe Renal Failure n (%)                                   | 19 (22)       | 1 (20)                       | 18 (22)                       | 0.88             |
| History of bleeding n (%)                                    | 4 (4)         | 0 (0)                        | 4 (5)                         | 0.60             |
| Coronary Artery Disease n (%)                                | 40 (47)       | 3 (60)                       | 37 (46)                       | 0.55             |
| <b><u>Neurological assessment</u></b>                        | -             | -                            | -                             | -                |
| MMSE <27 n (%)                                               | 9 (11)        | 1 (20)                       | 8 (10)                        | 0.70             |
| Prior stroke or TIA n (%)                                    | 16 (19)       | 3 (60)                       | 13 (16)                       | <b>0.01</b>      |
| <b><u>Preoperative TTE</u></b>                               | -             | -                            | -                             | -                |
| LVEF ≥ 55 n (%)                                              | 64 (76)       | 5 (100)                      | 59 (74)                       | 0.19             |
| Mean gradient mmHg mean ± SD                                 | 48 ± 12       | 46.2 ± 15.3                  | 48.4 ± 12.5                   | 0.70             |
| Indexed valve area cm <sup>2</sup> /m <sup>2</sup> mean ± SD | 0.39 ± 0.10   | 0.43 ± 0.10                  | 0.39 ± 0.04                   | 0.50             |
| Bicuspid valve n (%)                                         | 5 (6)         | 1 (20)                       | 4 (5)                         | 0.17             |
| <b><u>Medication before TAVR</u></b>                         | -             | -                            | -                             | -                |
| Aspirin n (%)                                                | 64 (76)       | 2 (40)                       | 62 (78)                       | 0.05             |
| Clopidogrel n (%)                                            | 29 (38)       | 3 (60)                       | 26 (32)                       | 0.21             |
| DAPT n (%)                                                   | 20 (23)       | 0 (0)                        | 20 (25)                       | 0.19             |
| Anticoagulant n (%)                                          | 28 (33)       | 1 (20)                       | 27 (34)                       | 0.51             |
| APT + Anticoagulant n (%)                                    | 16 (19)       | 0 (0)                        | 16 (20)                       | 0.26             |
| <b><u>Preprocedural MRI</u></b>                              | -             | -                            | -                             | -                |
| Patients with Microbleeds (CMB) n (%)                        | 22 (26)       | 2 (40)                       | 20 (25)                       | 0.46             |
| Patients with Cerebral emboli n (%)                          | 5 (5)         | NA                           | NA                            | NA               |
| <b><u>Postprocedural MRI</u></b>                             | -             | -                            | -                             | -                |
| Patients with ≥ New Microbleeds (CMB) n (%)                  | 19 (22)       | 2 (40)                       | 17 (22)                       | 0.33             |
| Patients with New Cerebral emboli n (%)                      | 54 (64)       | 4 (80)                       | 50 (63)                       | 0.44             |

**Supplemental Table 2. Risk factors for the presence of CE on preprocedural MRI**

APT: antiplatelet therapy; BMI: Body mass Index, CE: Cerebral emboli; CMB: Cerebral microbleed; DAPT: dual antiplatelet therapy; LVEF: left ventricular ejection fraction; MMSE: Mini-Mental State Examination; MRI: Magnetic Resonance Imaging; TIA: transient ischemic attack; TTE: transthoracic echography.

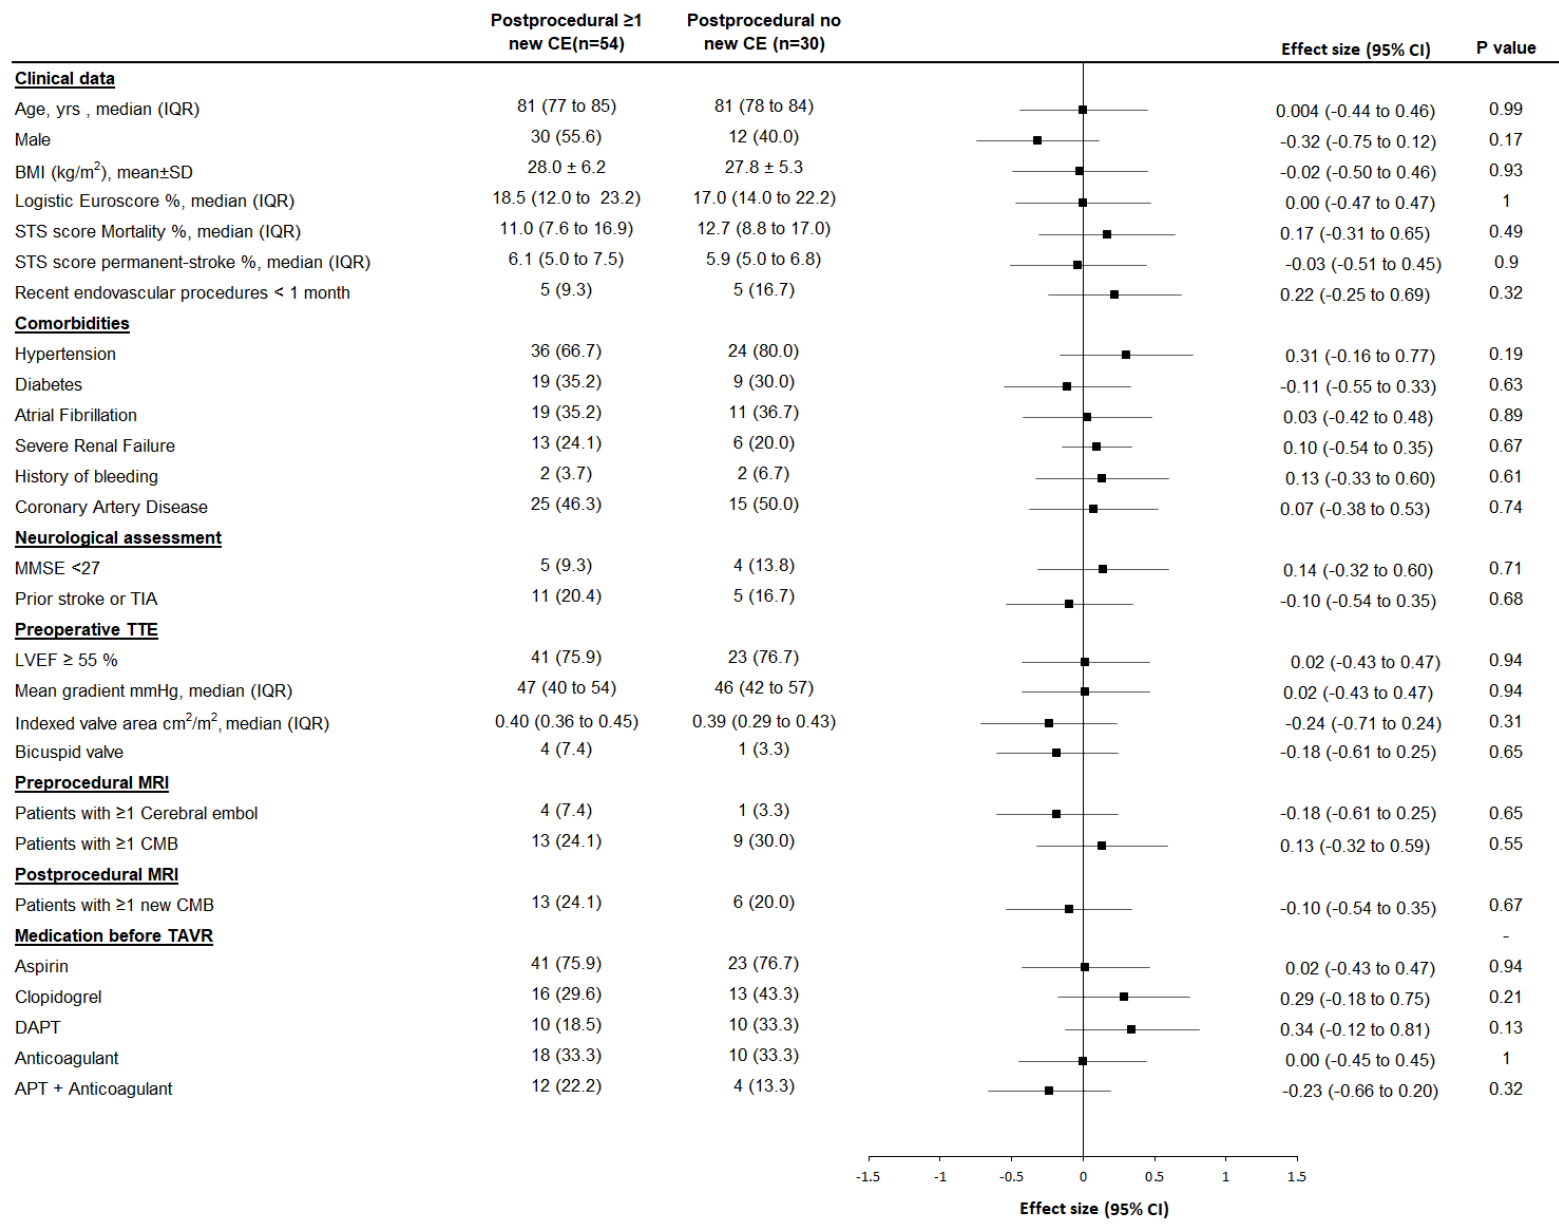

**Supplemental Table 3. Risk factors for the presence of new CE on post-procedural MRI**

APT: antiplatelet therapy; BMI: Body mass Index, CE: Cerebral embol; DAPT: dual antiplatelet therapy; LVEF: left ventricular ejection fraction; MMSE: Mini-Mental State Examination; TIA: transient ischemic attack; TTE: transthoracic echography.

|                                          | Index Event               | N          | Heart Valve disease | vWF defect* | Detailed data on vWF§ | Detailed data On anticoagulation§ | Pre-operative MRI | Post-operative MRI | Days between MRIs | Post-index event CMB rate    | Pre-index event CMB rate     | Localisation of CMB | Standardized Neurological evaluations |
|------------------------------------------|---------------------------|------------|---------------------|-------------|-----------------------|-----------------------------------|-------------------|--------------------|-------------------|------------------------------|------------------------------|---------------------|---------------------------------------|
| <b>Endocarditis</b>                      | -                         | -          | -                   | -           | -                     | -                                 | -                 | -                  | -                 | -                            | -                            | -                   | -                                     |
| Duval et al. 2010 <sup>31</sup>          | Endocarditis              | 130        | YES                 | †           | NO                    | NO                                | 1.5T              | -                  | NA                | 57%                          | -                            | -                   | -                                     |
| Goulenok et al. 2013 <sup>9</sup>        | Endocarditis              | 30         | YES                 | †           | NO                    | NO                                | 1.5T              | -                  | NA                | 56%                          | -                            | -                   | -                                     |
| lung et al. 2013 <sup>10</sup>           | Endocarditis              | 120        | YES                 | †           | NO                    | NO                                | 1.5T              | -                  | NA                | 60%                          | -                            | -                   | -                                     |
| Hess et al. 2013 <sup>32</sup>           | Endocarditis              | 109        | YES                 | †           | NO                    | NO                                | 1.5T              | -                  | NA                | 57%                          | -                            | 85% lobar           | -                                     |
| <b>Total:</b>                            | -                         | <b>389</b> | -                   | -           | -                     | -                                 | -                 | -                  | -                 | -                            | -                            | -                   | -                                     |
| <b>Cardiovascular Interventions</b>      | -                         | -          | -                   | -           | -                     | -                                 | -                 | -                  | -                 | -                            | -                            | -                   | -                                     |
| Sang-Beom Jeon et al. 2010 <sup>33</sup> | Cardiac valve Surgery CBP | 19         | YES                 | †           | NO                    | NO                                | 1.5T              | 1.5T               | 7 days            | 63%;<br>95%CI 38-83%         | 5% ;<br>95%CI 0.1-26%        | 46% lobar           | -                                     |
| Liebeskind et al. 2012 <sup>13</sup>     | ECLS in Children          | 6          | NO                  | ‡           | NO                    | NO                                | -                 | 1.5T               | NA                | 100%                         | -                            | Most lobar          | -                                     |
| Yoshioka et al. 2017 <sup>12</sup>       | LVAD explantation         | 35         | NO                  | ‡           | NO                    | Yes                               | -                 | 3.0T               | NA                | <b>97%</b>                   | -                            | -                   | -                                     |
| Patel et al. 2019 <sup>11</sup>          | Cardiac Surgery CBP       | 75         | YES                 | †           | NO                    | NO                                | 1.5T              | 1.5T               | 7 weeks           | 76%                          | <b>36%</b>                   | 70% lobar           | YES                                   |
| Van Belle et al. 2022                    | TAVR                      | <b>84</b>  | <b>YES</b>          | †           | <b>Yes</b>            | <b>Yes</b>                        | <b>1.5T</b>       | <b>1.5T</b>        | <b>3 days</b>     | <b>23%;<br/>95%CI 14-33%</b> | <b>26%,<br/>95%CI=17-37%</b> | <b>69% lobar</b>    | <b>YES</b>                            |
| <b>Total:</b>                            | -                         | <b>219</b> | -                   | -           | -                     | -                                 | -                 | -                  | -                 | -                            | -                            | -                   | -                                     |

**Supplemental Table 4. Summary of studies describing cerebral microbleeds in acute cardiac scenarios**

- : no data

CBP: cardiopulmonary bypass; CMB: Cerebral microbleed; CBP: Cardiopulmonary bypass; ECLS: extra-corporeal life support; LVAD: left ventricular assist device, MRI; Magnetic resonance imaging; NA: non applicable, T: Tesla (MRI); VWF: von Willebrand Factor.

\*: according to published literature<sup>20,22,45</sup> all these clinical scenarios are known to be associated with at least moderate VWF multimer defect:

- † Moderate to severe VWF multimer defect is known to be present in patients with severe aortic stenosis and severe regurgitant valve disease<sup>20,22</sup>

- ‡ Severe to profound VWF multimer defect is known to be present in patients with assist device (ECLS or LVAD)<sup>45</sup>

§ : To describe whether these data were provided as part of the study.
